# Supplementary material
Source: publisher site journal article supplement (https://www.dovepress.com/article/537574)
Supplement: Supplementary file 1 [file 537574%20Supplementary%20file.doc]

| 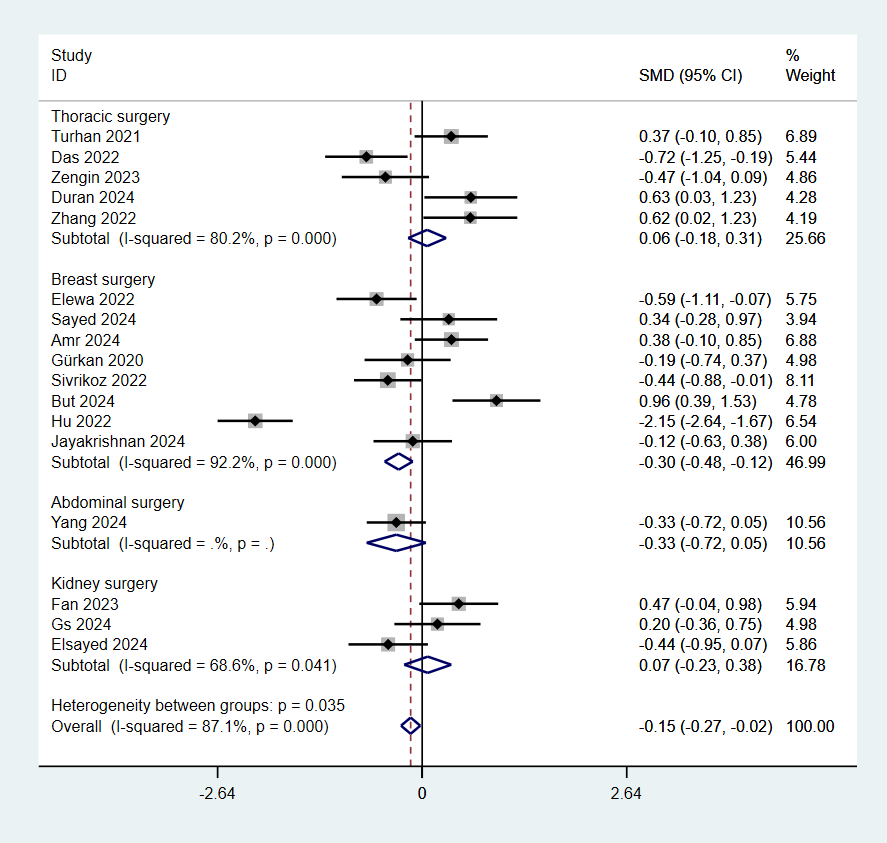 |
| --- |
| Supplementary material: Figure 1. Funnel plot of resting VAS at 12 h. SMD, standardized mean difference. Turhan 2021 22, Das 2022 31, Zengin 2023 25, Duran 2024 29, Zhang 2022 27, Elewa 2022 37, Sayed 2024 39, Amr 2024 40, Gürkan 2020 41, Sivrikoz 2022 36, But 2024 44, Hu 2022 45, Jayakrishnan 2024 33, Yang 2024 48, Fan 2023 50, Gs 2024 51, Elsayed 2024 53 |

| 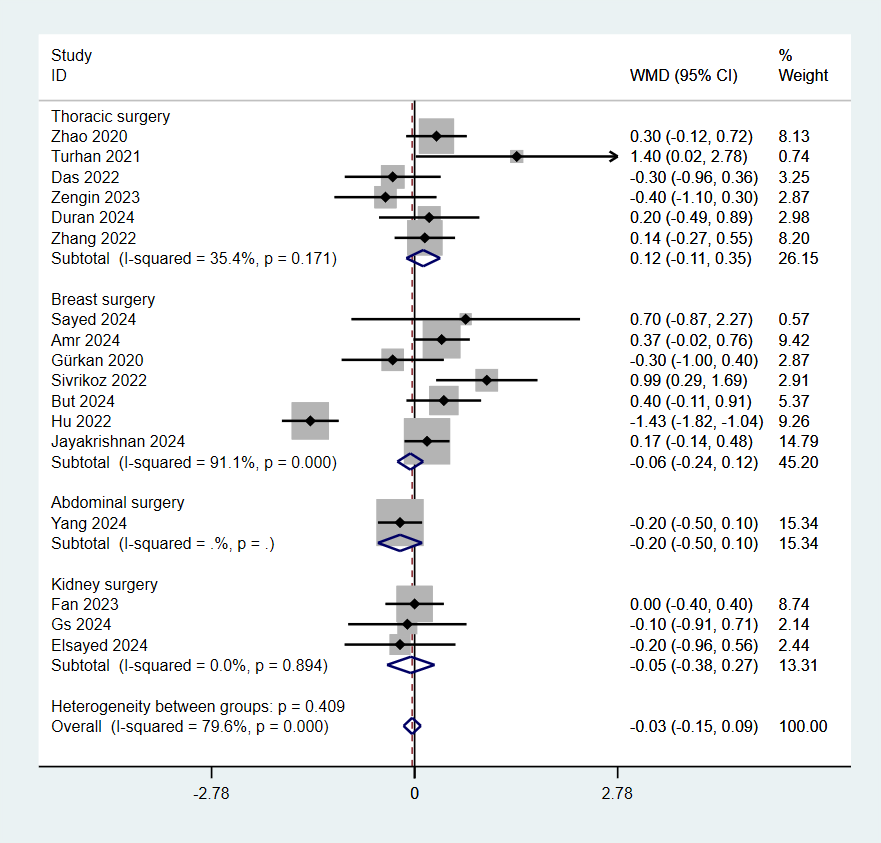 |
| --- |
| Supplementary material: Figure 2. Funnel plot of resting VAS at 24 h. WMD, weighted mean difference. Zhao 2020 21, Turhan 2021 22, Das 2022 31, Zengin 2023 25, Duran 2024 29, Zhang 2022 27, Sayed 2024 39, Amr 2024 40, Gürkan 2020 41, Sivrikoz 2022 36, But 2024 44, Hu 2022 45, Jayakrishnan 2024 33, Yang 2024 48, Fan 2023 50, Gs 2024 51, Elsayed 2024 53 |

| 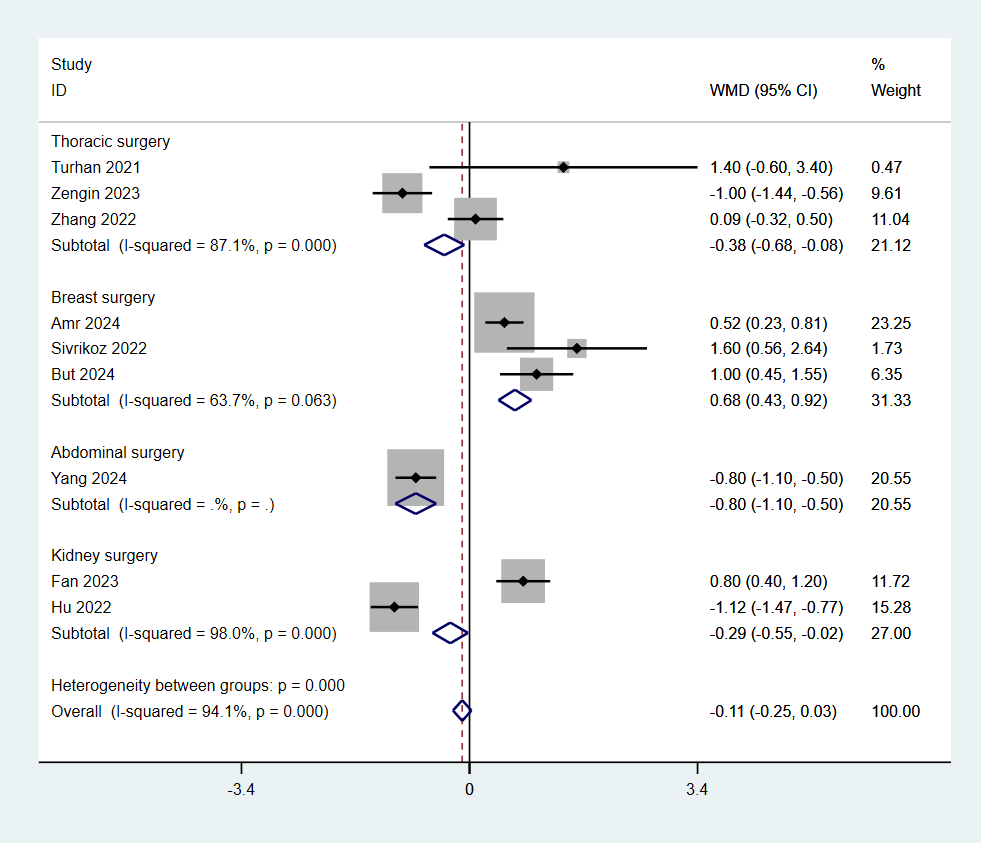 |
| --- |
| Supplementary material: Figure 3. Funnel plot of movement VAS at 6 h. WMD, weighted mean difference. Turhan 2021 22, Zengin 2023 25, Zhang 2022 27, Amr 2024 40, Sivrikoz 2022 36, But 2024 44, Yang 2024 48, Fan 2023 50, Hu 2022 45 |

| 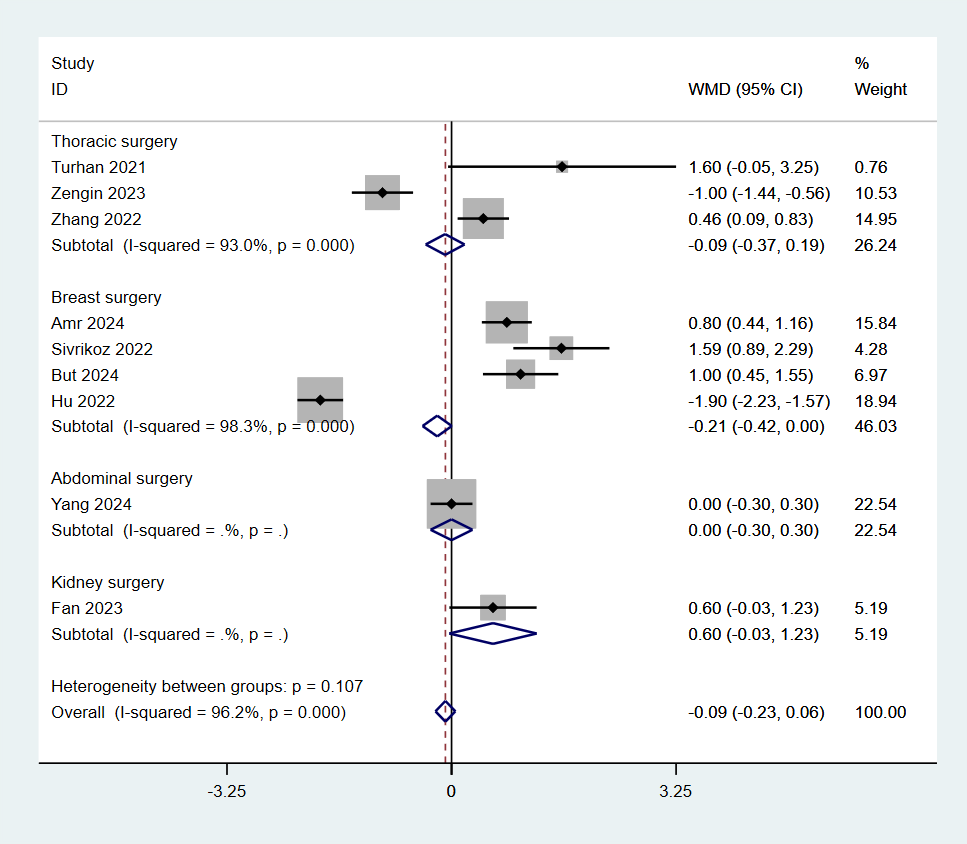 |
| --- |
| Supplementary material: Figure 4. Funnel plot of movement VAS at 12 h. WMD, weighted mean difference. Turhan 2021 22, Zengin 2023 25, Zhang 2022 27, Amr 2024 40, Sivrikoz 2022 36, But 2024 44, Hu 2022 45, Yang 2024 48, Fan 2023 50 |

| 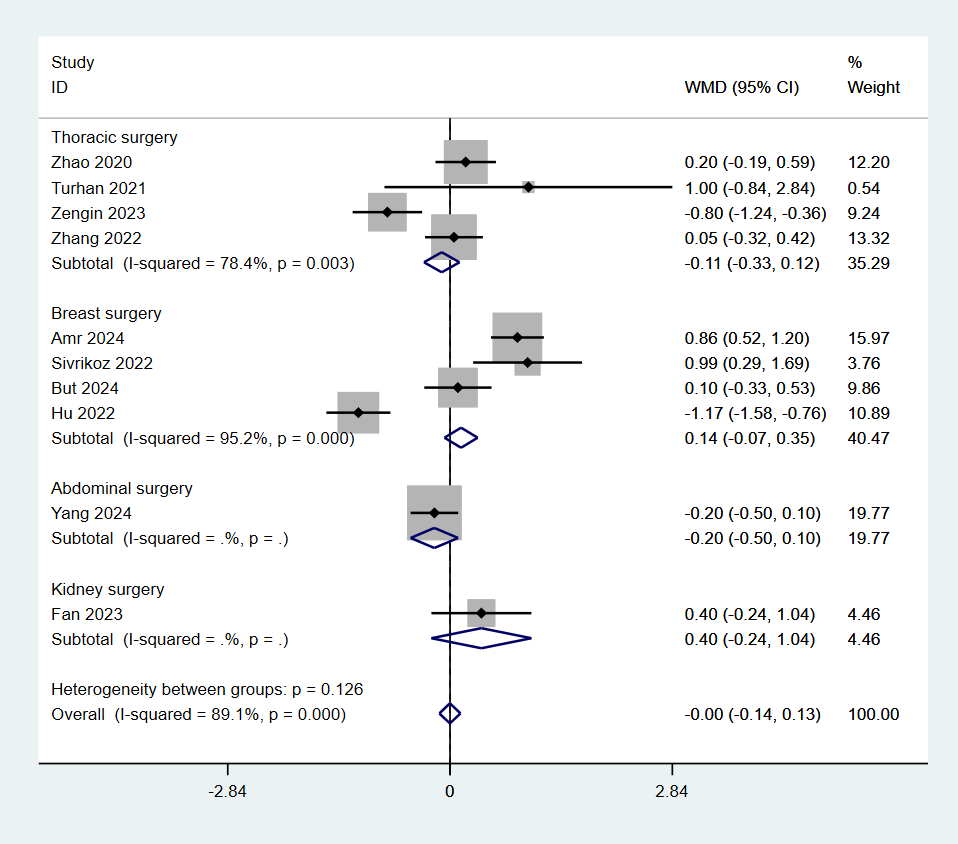 |
| --- |
| Supplementary material: Figure 5. Funnel plot of movement VAS at 24 h. WMD, weighted mean difference. Zhao 2020 21, Turhan 2021 22, Zengin 2023 25, Zhang 2022 27, Amr 2024 40, Sivrikoz 2022 36, But 2024 44, Hu 2022 45, Yang 2024 48, Fan 2023 50 |

| 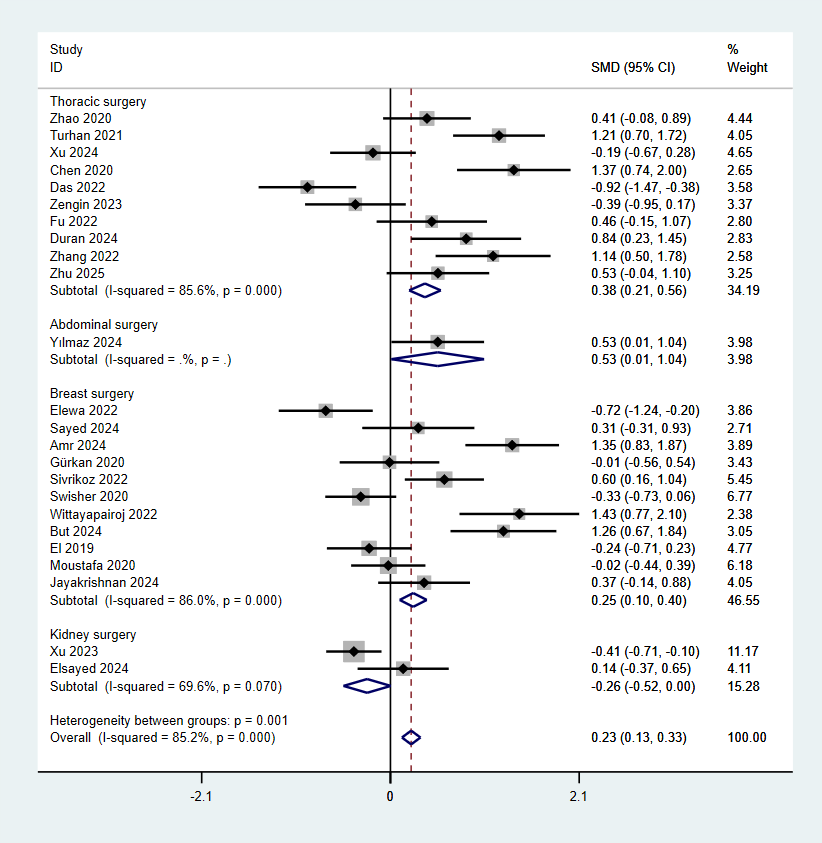 |
| --- |
| Supplementary material: Figure 6. Funnel plot of total morphine consumption in first 24 h. SMD, standardized mean difference. Zhao 2020 21, Turhan 2021 22, Xu 2024 32, Chen 2020 23, Das 2022 31, Zengin 2023 25, Fu 2022 26, Duran 2024 29, Zhang 2022 27, Zhu 2025 28, Yılmaz 2024 47, Elewa 2022 37, Sayed 2024 39, Amr 2024 40, Gürkan 2020 21, Sivrikoz 2022 36, Swisher 2020 46, Wittayapairoj 2022 43, But 2024 44, El 2019 35, Moustafa 2020 38, Jayakrishnan 2024 33, Xu 2023 49, Elsayed 2024 53 |

| 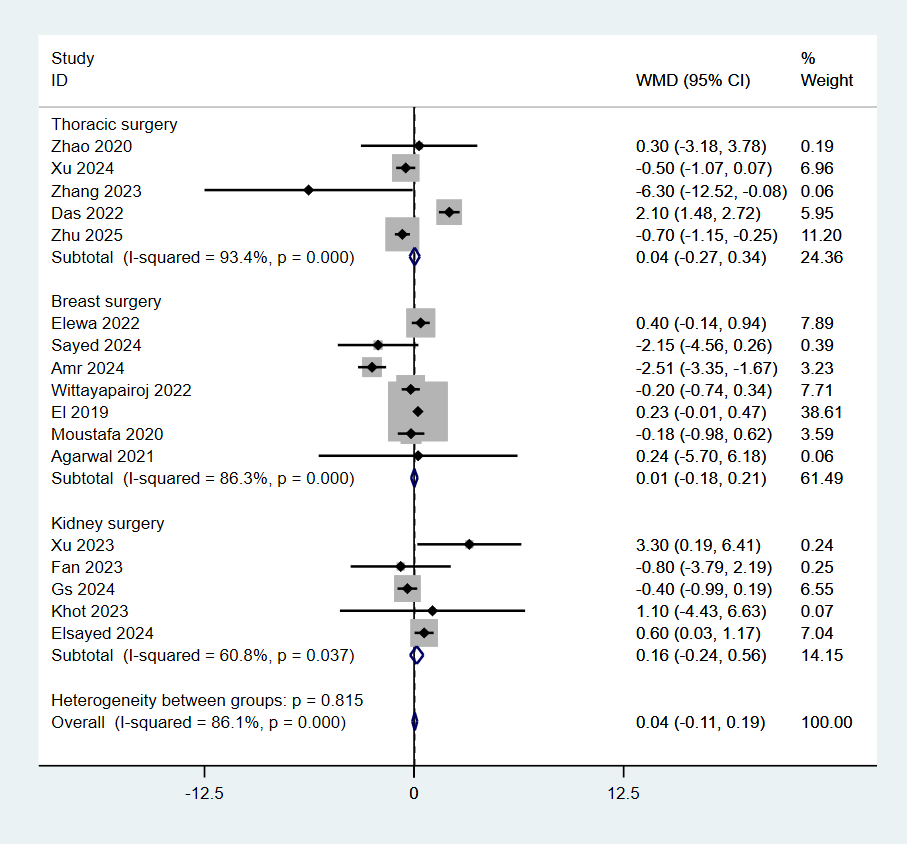 |
| --- |
| Supplementary material: Figure 7. Funnel plot of time of first rescue analgesia. WMD, weighted mean difference. Zhao 2020 21, Xu 2024 32, Zhang 2023 24, Das 2022 31, Zhu 2025 28, Elewa 2022 37, Sayed 2024 39, Amr 2024 40, Wittayapairoj 2022 43, El 2019 35, Moustafa 2020 38, Agarwal 2021 34, Xu 2023 49, Fan 2023 50, Gs 2024 51, Khot 2023 52, Elsayed 2024 53 |

| 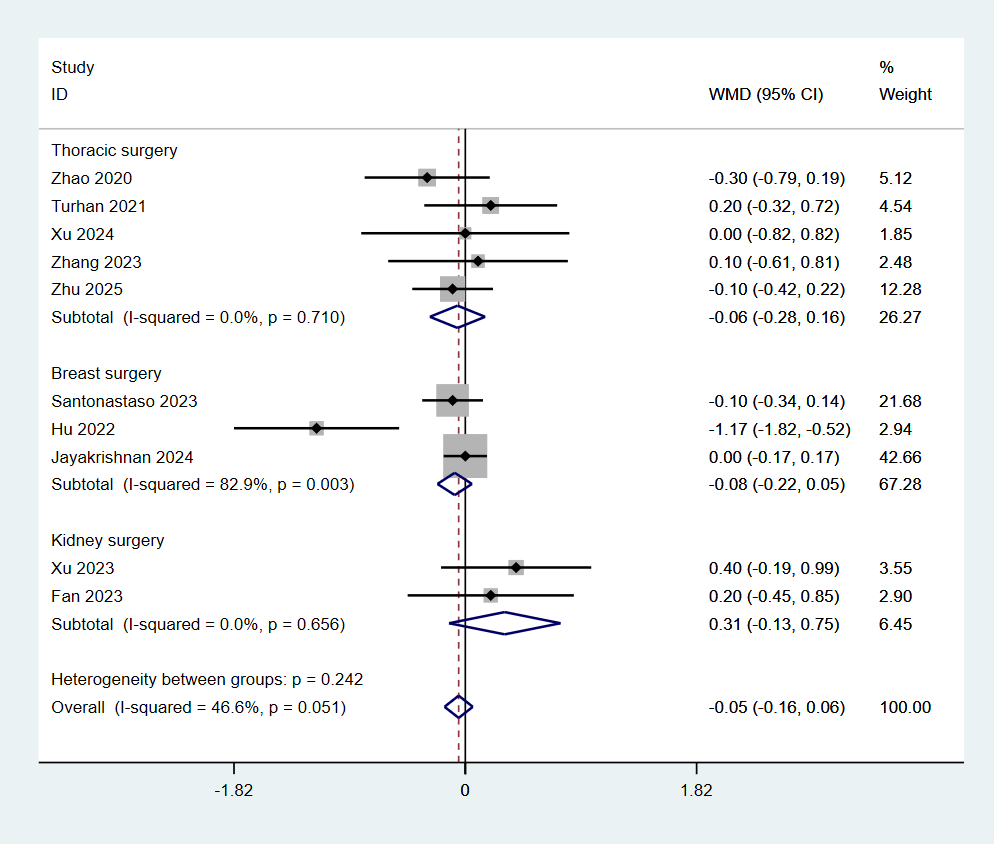 |
| --- |
| Supplementary material: Figure 8. Funnel plot of length of stay hospital. WMD, weighted mean difference. Zhao 2020 21, Turhan 2021 22, Xu 2024 32, Zhang 2023 24, Zhu 2025 28, Santonastaso 2023 42, Hu 2022 45, Jayakrishnan 2024 33, Xu 2023 49, Fan 2023 50 |

| 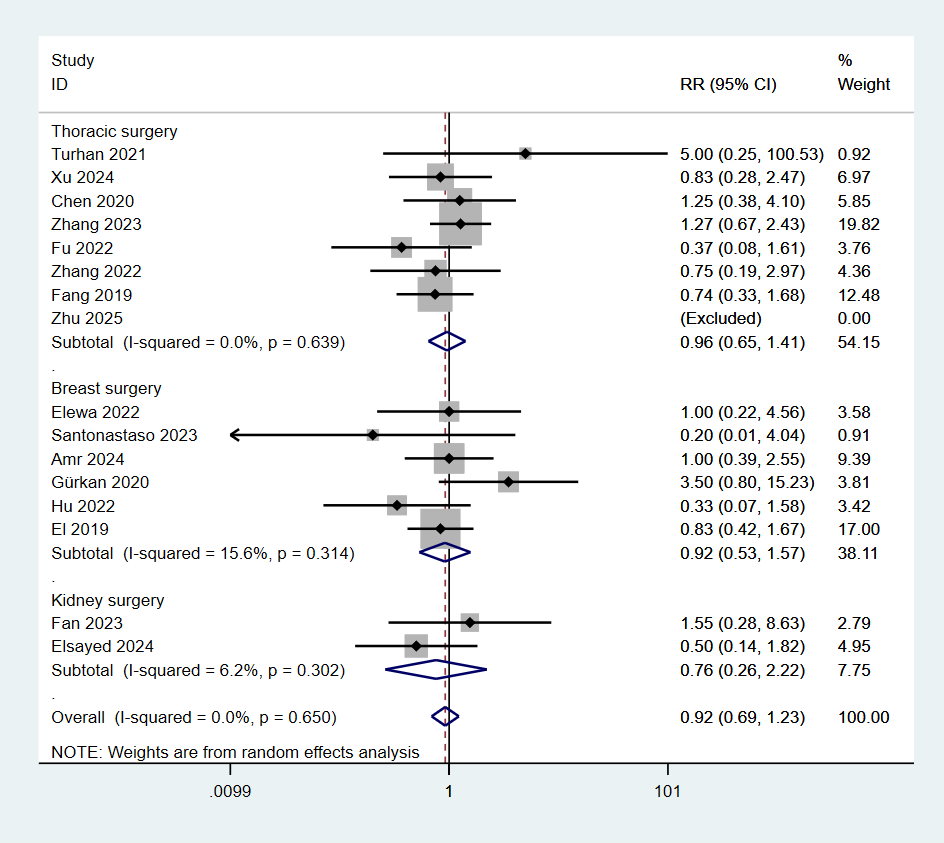 |
| --- |
| Supplementary material: Figure 9. Funnel plot of PONV. RR, relative risk. Turhan 2021 22, Xu 2024 32, Chen 2020 23, Zhang 2023 24, Fu 2022 26, Zhang 2022 27, Fang 2019 30, Zhu 2025 28, Elewa 2022 37, Santonastaso 2023 42, Amr 2024 40, Gürkan 2020 41, Hu 2022 45, El 2019 35, Fan 2023 50, Elsayed 2024 53 |
